# Supplementary material for: Overexpression of VP, a vacuolar H+-pyrophosphatase gene in wheat (Triticum aestivum L.), improves tobacco plant growth under Pi and N deprivation, high salinity, and drought
Source: PubMed Central journal article supplement (PMC3904725; doi:10.1093/jxb/ert442), 2014-01-27
Supplement: supp_ert442_jexbot112250_file001.pdf [file supp_ert442_jexbot112250_file001.pdf]

**Supplemental Table 1** Primers used in this study

| Gene name         | Purpose                                         | Primer                                                                     |
|-------------------|-------------------------------------------------|----------------------------------------------------------------------------|
| <i>TaVP</i>       | <i>TaVP</i> expression                          | Forward: 5'-GGTTCTCTGCGATGACCATG<br>Reverse: 5'-CAACATGATTGCGCAAGACC       |
| Wheat tubulin     | Internal standard in<br><i>TaVP</i> expression  | Forward: 5'-CATGCTATCCCTCGTCTCGACCT<br>Reverse: 5'-CGCACTTCATGATGGAGTTGTAT |
| <i>TaVP</i>       | <i>TaVP</i> expression cassette                 | Forward: 5'-TTTCCATGGTGGCGGGCGGCGAT<br>Reverse: 5'-TTTGGTCACCGGCAAACTAGAT  |
| Tobacco tubulin   | Internal standard in<br>tobacco gene expression | Forward: 5'-GGAGGTTACCGAGGCTGA<br>Reverse: 5'-GCATGTAGTCTTCCAAAG           |
| <i>NtPIN1</i>     | Tobacco auxin<br>transport-associated gene      | Forward: 5'-CGTGTATACAAAGTTCAAGCCA<br>Reverse: 5'-ACCAGTGTTATCGGCAACG      |
| <i>NtPIN1b</i>    | Tobacco auxin<br>transport-associated gene      | Forward: 5'-CGTAGCCATTGTACAGGTCA<br>Reverse: 5'-CAAGGCAATCAACATCCCAA       |
| <i>NtPIN3</i>     | Tobacco auxin<br>transport-associated gene      | Forward: 5'-CGCATTGGCTCTGAAAGAGT<br>Reverse: 5'-AGGAGATTGGTACTTGATCG       |
| <i>NtPIN3b</i>    | Tobacco auxin<br>transport-associated gene      | Forward: 5'-GGCTGTGAGATTTCTAACTG<br>Reverse: 5'-TGGTAATGCTATCAACATTCC      |
| <i>NtPT</i>       | Tobacco phosphate<br>transporter gene           | Forward: 5'-GCCATTCCATATCATCATTG<br>Reverse: 5'-GACCTCATTCTCTTCCCAC        |
| <i>NtPT1</i>      | Tobacco phosphate<br>transporter gene           | Forward: 5'-CCATGGACTTCACTTGCTTG<br>Reverse: 5'-ATTTCTCTTCCCCTTTCCC        |
| <i>NtPT2</i>      | Tobacco phosphate<br>transporter gene           | Forward: 5'-GGTTCGTGATCATGTACTCA<br>Reverse: 5'-GACCTCATTCTCTTCCCAC        |
| <i>NtPT3</i>      | Tobacco phosphate<br>transporter gene           | Forward: 5'-AGGGTACTGGTTCACCGTG<br>Reverse: 5'-ATTATAATTACACACTTGGTCTG     |
| <i>NtPT4</i>      | Tobacco phosphate<br>transporter gene           | Forward: 5'-GCACTACTTAGTACAGTGCC<br>Reverse: 5'-GCATCACAAAGTCTACCTCC       |
| <i>NtNRT1.1;1</i> | Tobacco nitrate<br>transporter gene             | Forward: 5'-CCGTTTCTTGGACAAGGCAG<br>Reverse: 5'-TTCTCCTTGTACACATACCG       |
| <i>NtNRT1.1;2</i> | Tobacco nitrate<br>transporter gene             | Forward: 5'-GGCTTCATTGACTCTTCT<br>Reverse: 5'-CTTGTACACATACCGTCTCG         |
| <i>NtNRT1.2;1</i> | Tobacco nitrate<br>transporter gene             | Forward: 5'-GGCTTCACTCACAGTATTTT<br>Reverse: 5'-TTTCAGCAAGTCTCTTCTCC       |
| <i>NtNRT1.2;2</i> | Tobacco nitrate<br>transporter gene             | Forward: 5'-GGCACTAACGTTGTAATCAAC<br>Reverse: 5'-AATTCAATCCCCATTTTCAGC     |
| <i>NtNRT2.1</i>   | Tobacco nitrate<br>transporter gene             | Forward: 5'-GGACGTGGATCTTTGTTCTT<br>Reverse: 5'-TTCTCGGCGAACTTCAAGC        |
| <i>NtNRT2.2</i>   | Tobacco nitrate<br>transporter gene             | Forward: 5'-GCTGCAACAAATTACAGGAC<br>Reverse: 5'-ATTA ACTACTCACACTTGGG      |

ACTACACAAGCAATGCATACAGTCCTGTGCAGGATGTTGCT  
GATTCCTGCAGAACTGGAGCTGCAACCAATGTCATCTTTGG  
TCTTGCTCTGGGATACAAATCAGTTATTATCCCTATCTTCG  
CCATTGCCTTCAGTATTTTCCTCAGCTTCAGCCTCCCCGCG  
ATGTATGGTGTGCTGTGGCTGCTCTTGGAATGCTCAGCAC  
AATTGCGACCGGTCTTGCCATTGATGCCTATGGCCCTATCA  
GTGACAATGCTGGAGGCATTGCTGAAATGGCTGGCATGAGC  
CACAGAATCCGTGAAAGAACTGATGCTCTGGATGCTGCAGG  
AAACACAACCTGCTGCCATTGGAAAGGGTTTTGCAATTGGCT  
CGGCTGCCTTGGTGTCCCTTGCTCTCTTCGGTGCCTTTGTG  
AGCCGCGCCGGGATCACAACTGTTGATGTTCTGACACCAAA  
CGTTTTCAATTGGACTCCTTGTTGGCGCTATGCTCCCGT

**Supplemental Fig. 1** Expressed sequence tag sequence of *TaVP*

```

1  ---M A I L G E L G T E I L L I F V C G V V G I V F A V A Q U F I V S K V K V T P G --- A A S A A G G G --- K TaVP1 Brini
1  M V A A A I L F E L A T Q L V V P V A A A V G I A F A V L Q V V L V S K V K V A P E P R G E G G S A A G G G A G A G A K TaVPV
49  N G Y G D Y L I E E E E G L N D H N V V K C A E I Q T A I S E G A T S F L F T M Y Q Y V G M F M V V F A A V I F V F L TaVP1 Brini
61  D G A S E Y L I E E E E G L N D H M I V L K C A E I Q T A I S E G A T S F L F T E Y K Y A G G F M T V F A V L I F V F L TaVPV
109  G S I E G F S T K G Q P C T Y S T G - T C K P A L Y T A L F S T A S F L L G A I T S L V S G F L G M K I A T Y A N A R T TaVP1 Brini
121  G S I E G F S T K S Q P C H Y S V G K T C K P A L A N A A F S T I A F V L G A V T S L V S G F L G M K I A T Y A N A R T TaVPV
168  T L E A R K G V G K A F I T A F R S G A V M G F L L S S S G L G V L Y I T I N V F K M Y Y G D D W E G L F E S I T G Y G TaVP1 Brini
181  T L E A R K G V G K A F I V A F R S G A V M G F L L A A S G L F V L Y V A I N L F G L Y Y G D D W E G L F E A I T G Y G TaVPV
228  L G G S S M A L F G R V G G G I Y T K A A D V G A D L V G K V E R M I P E D G P R N P A V I A D N V G D M V G D I A G M TaVP1 Brini
241  L G G S S M A L F G R V G G G I Y T K A A D V G A D L V G K V E R M I P E D D P R N P A V I A D N V G D M V G D I A G M TaVPV
288  G S D L F G S Y A E S S C A A L V V A S I S S F G I N H D F T A M C Y P L L V S S V G I I V C L L T T L F A T D F F E I TaVP1 Brini
301  G S D L F G S Y A E S S C A A L V V A S I S S F G I N R E F T F M M Y P L L I S S V G I I A C L I T T L F A T D F F E V TaVPV
348  K A A S E I E P A L K K Q L I I F T A L H T I G W A V I N U L A L P A K F T I F N F G A Q K D V S N U G L F F C V A V G TaVP1 Brini
361  K E V D Q I E P A L K K Q L I I S T A V M T V G I A L V S W L G L P Y T F T I F N F G A Q K T V H S U Q L F L C V A V G TaVPV
408  L W A G L I I G F V T E Y Y T S N A Y S P V Q D V A D S C R T G A A T M V I F G L A L G Y K S V I I P I F A I A V S I Y TaVP1 Brini
421  L W A G L V I G F I T E Y Y T S N A Y S P V Q D V A D S C R T G A A T M V I F G L A L G Y K S V I I P I F A I A F S I F TaVPV
468  V S F S I A A M Y G I A M A A L G M L S T T A T G L A I D A Y G P I S D N A G G I A E M A G M S H R I R E R T D A L D A TaVP1 Brini
481  L S F S L P A M Y G V A V A A L G M L S T I A T G L A I D A Y G P I S D N A G G I A E M A G M S H R I R E R T D A L D A TaVPV
528  A G N T T A A I G K G F A I G S A A L V S L A L F G A F V S R A G V K V V D V L S P K V F I G L I V G A M L P Y W F S A TaVP1 Brini
541  A G N T T A A I G K G F A I G S A A L V S L A L F G A F V S R A G I T T V D V L T P N V F I G L L V G A M L P Y W F S A TaVPV
588  M T E R W C E S A A L K M V E K V R R O F N T I P G L M K G T A K P D Y A T C V K I S T D A S I R E M I P P G A L V M L TaVP1 Brini
601  M T M R S V G S A A L K M V E E V R R O F N T I P G L M E G T A K P D Y A T C V K I S T D T S I K E M I P P G A L V M L TaVPV
648  T P L I V G T L F G V E T L S G V L A G A L V S G V Q I A I S A S M T G G A W D N A K K Y I E A G M S E H A R S L G P K TaVP1 Brini
661  T P L I V G T F F G V E T L S G V L A G A L V S G V Q I A I S A S M T G G A W D N A K K Y I E A G A S E H A R S L G P K TaVPV
708  G S D C H K A A V I G D T I G D P L K D T S G P S L N I L I K L M A V E S L V F A P P F A T Y G G I L F K Y L TaVP1 Brini
721  G S D C H K A A V I G D T I G D P L K D T S G P S L N I L I K L M A V E S L V F A P P F A T Y G G I L F K Y L TaVPV

```

Supplemental Fig. 2 Alignment results of TaVP and TVP1 at the amino acid level

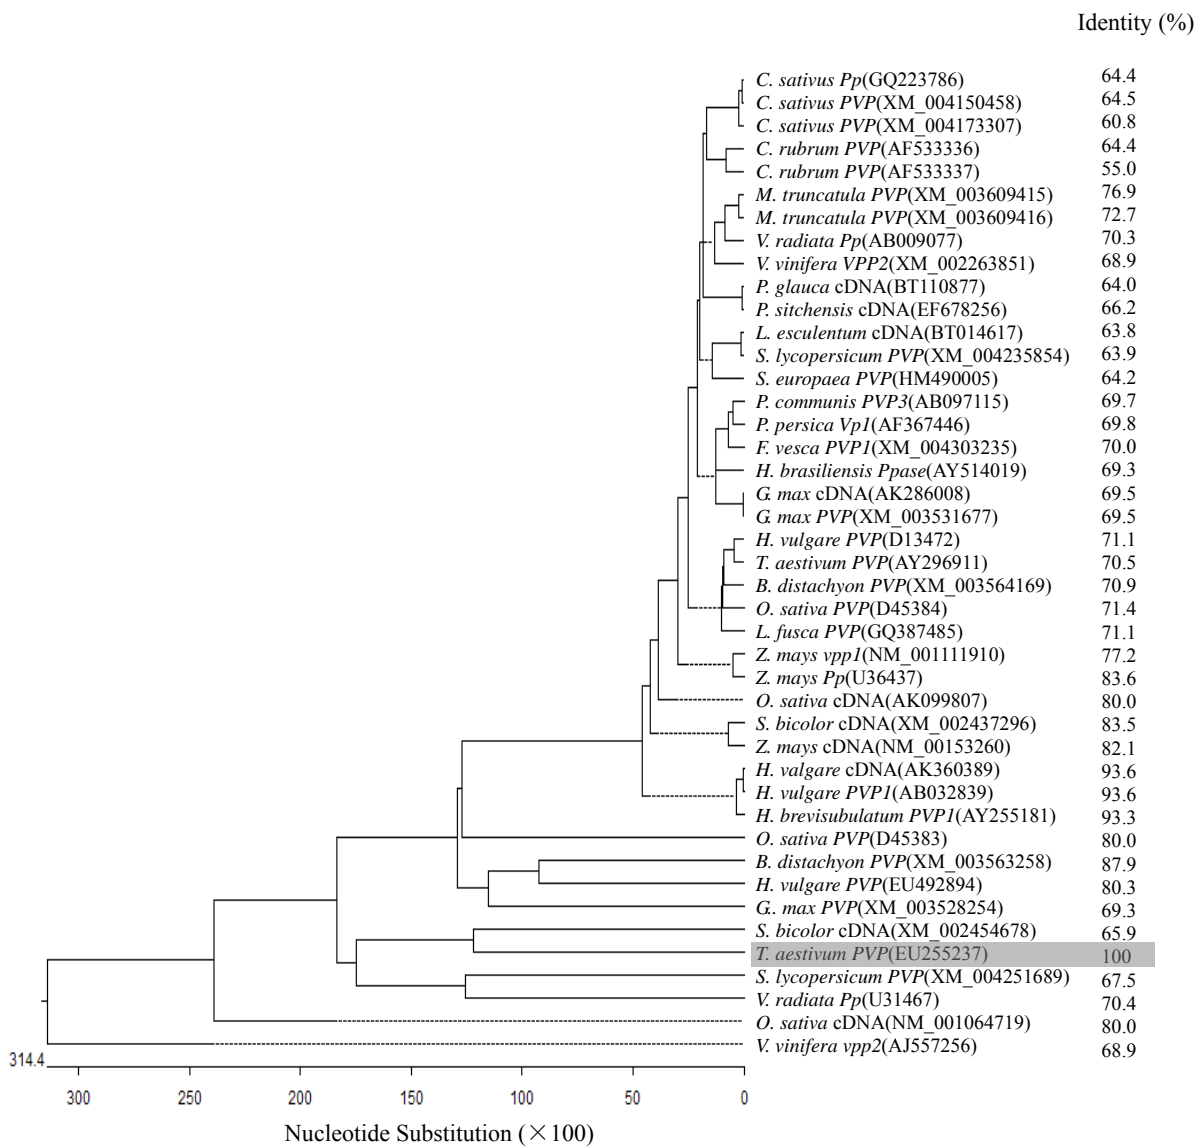

**Supplemental Fig. 3** Phylogenetic relationship between *TaVP* and its homologs in diverse plant species

**A**

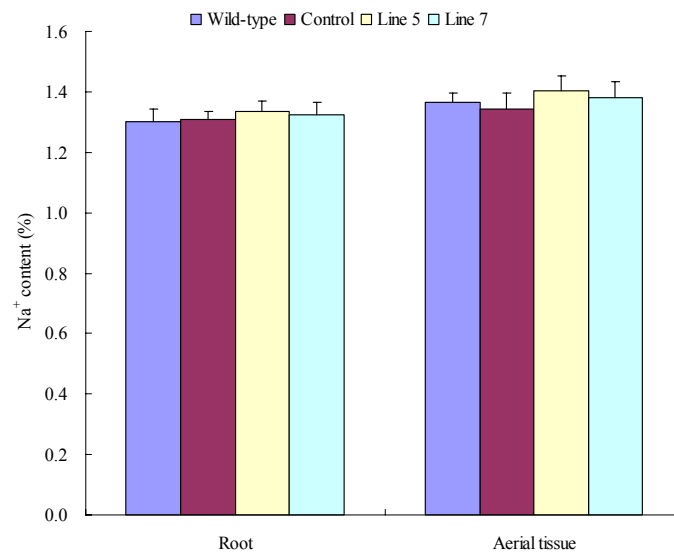

**B**

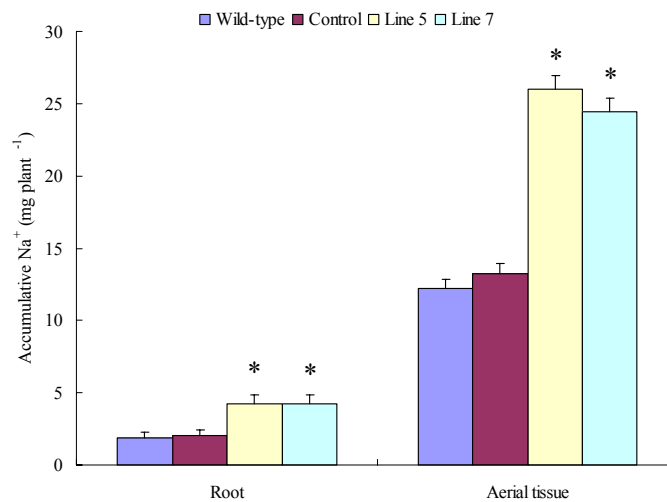

**Supplemental Fig. 4** Na<sup>+</sup> contents in the wild-type, control, and *TaVP*-overexpressing tobacco plants under high salinity

**A.** The Na<sup>+</sup> contents. **B.** The accumulative Na<sup>+</sup> amounts. Control, transformed with an empty vector. Line 3 and Line 5, two *TaVP*-overexpressing transgenic lines. **A** and **B**, bars represent the SE of four independent assays and the symbol \* indicates the significant difference at P<0.01 compared with the wild-type.
